# Supplementary material for: Real-time monitoring of cAMP in brown adipocytes reveals differential compartmentation of β1 and β3-adrenoceptor signalling
Source: PubMed Central journal article supplement — Mol Metab. 2020 Apr 1;37:100986. doi: 10.1016/j.molmet.2020.100986 (PMC7191645; doi:10.1016/j.molmet.2020.100986), 2020-04-01

# Suppl. Fig. 1

## $\beta$ -Adrenergic Receptors

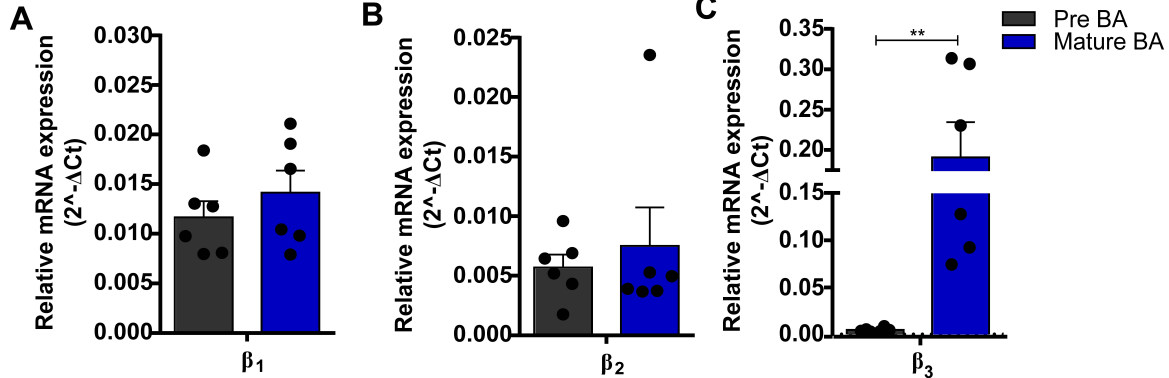

# Suppl. Fig. 2

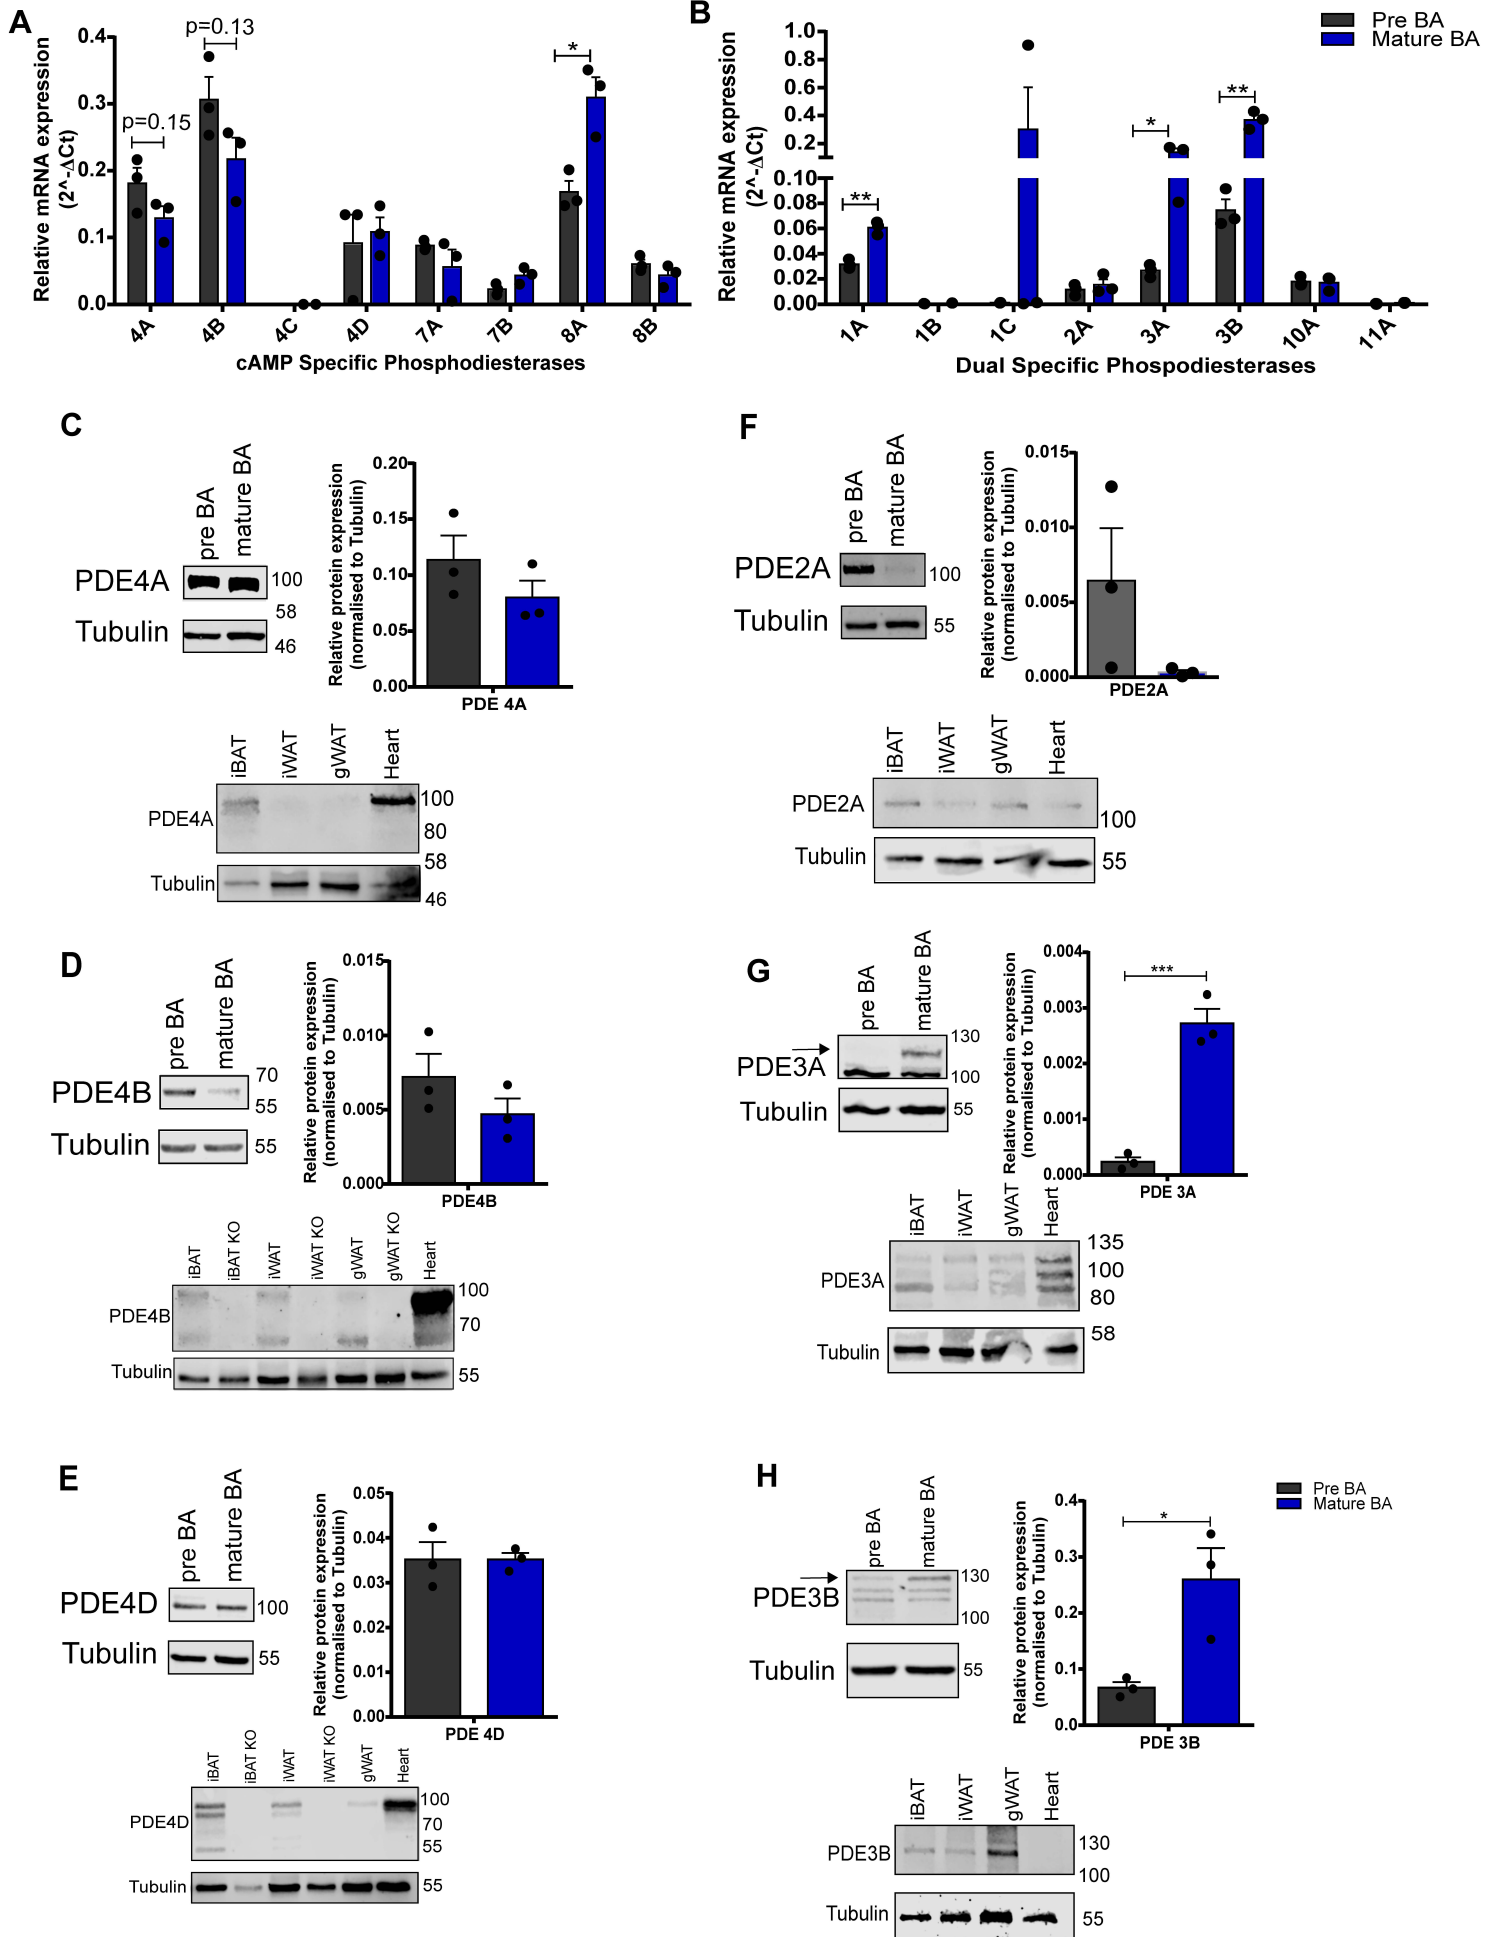



# Suppl. Fig. 4

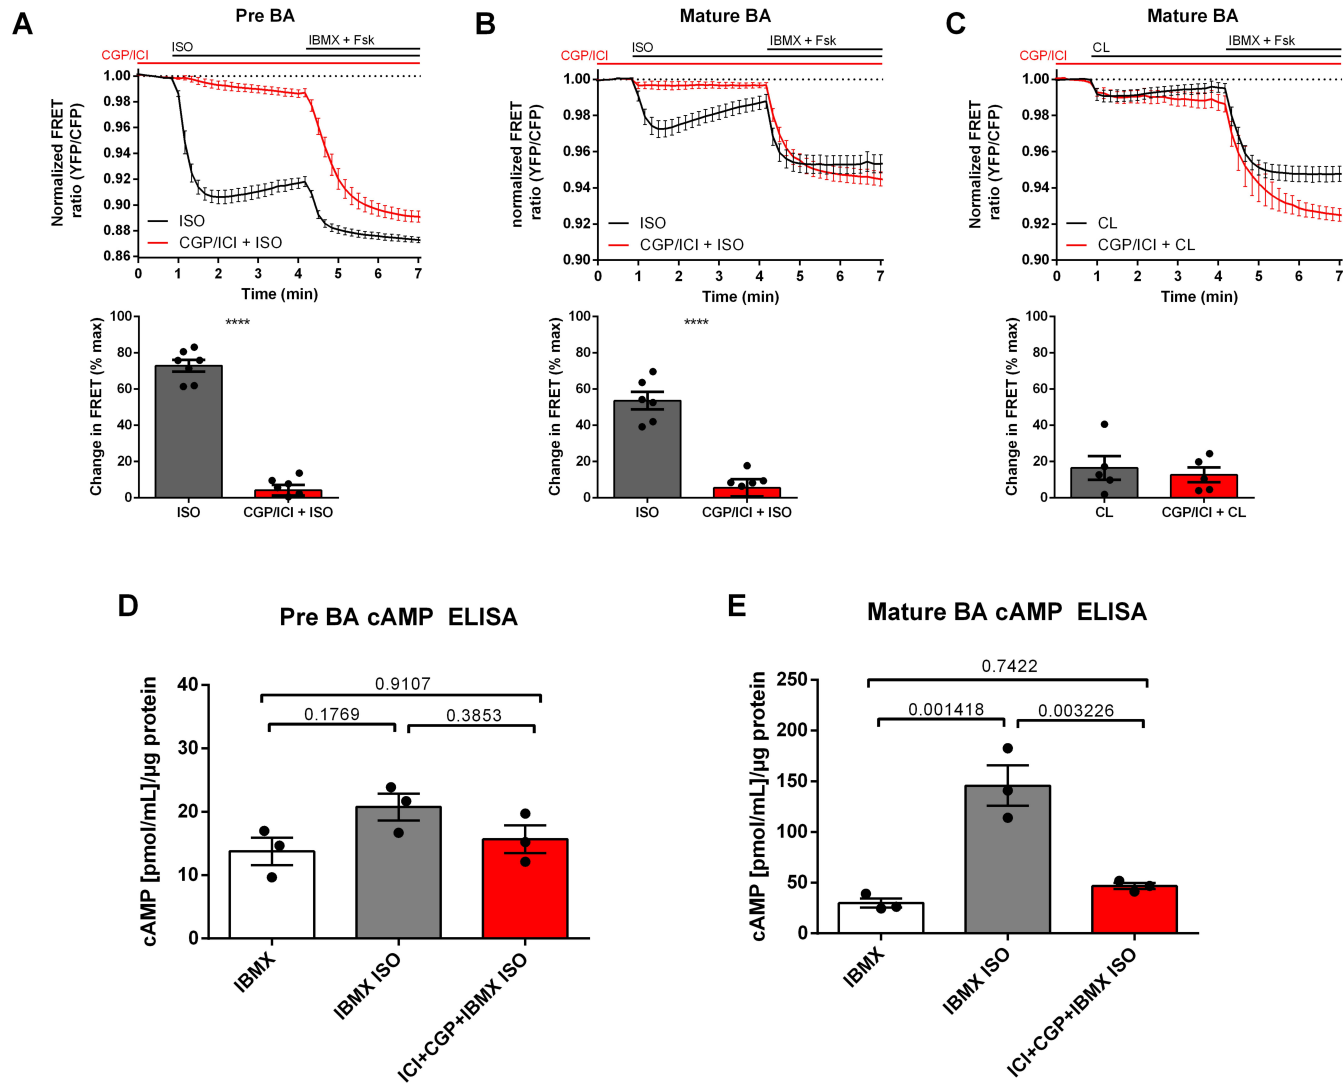



# Suppl. Fig. 5

Pre BA

Mature BA

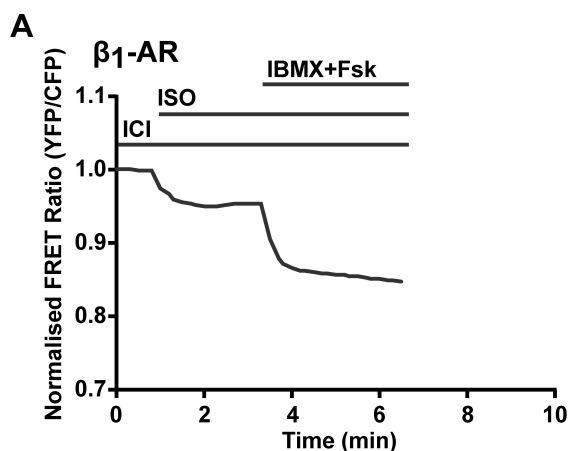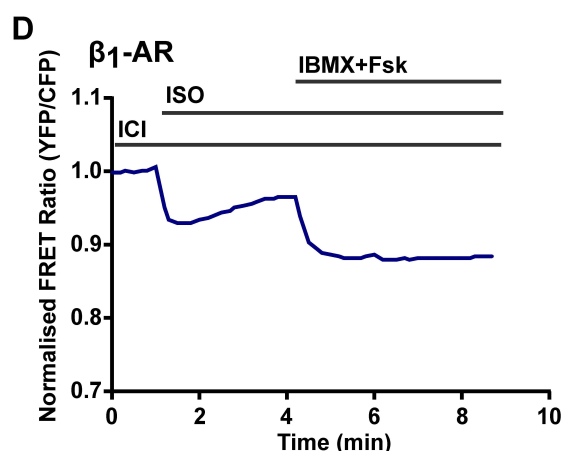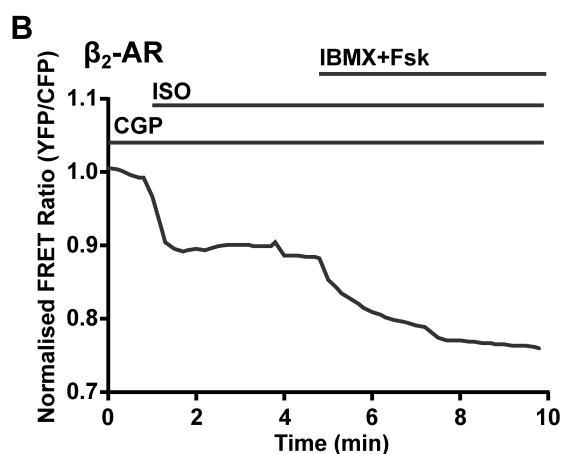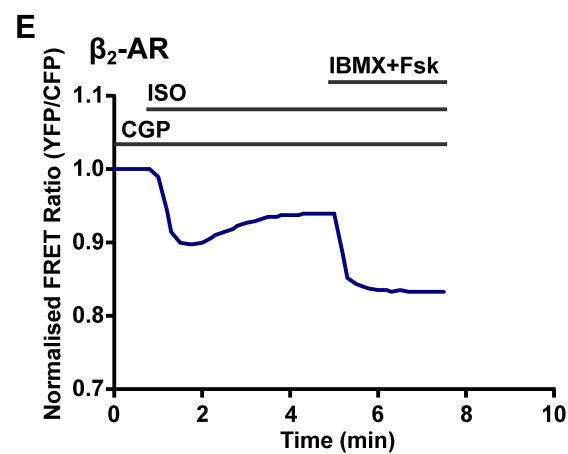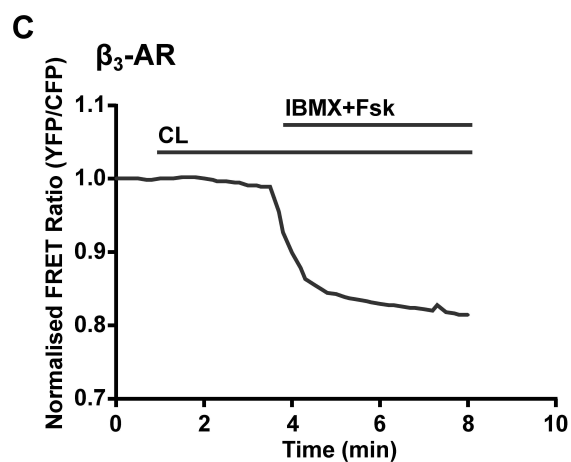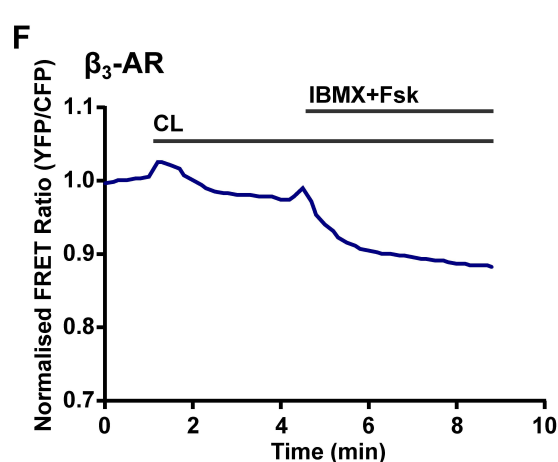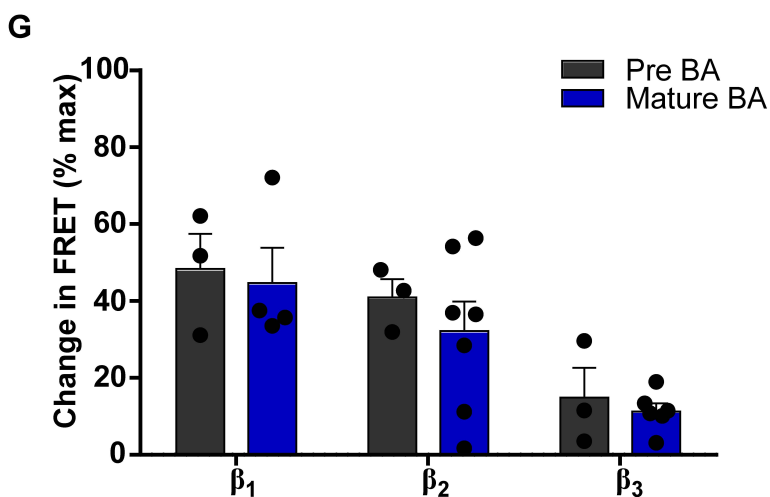

# Suppl. Fig. 6

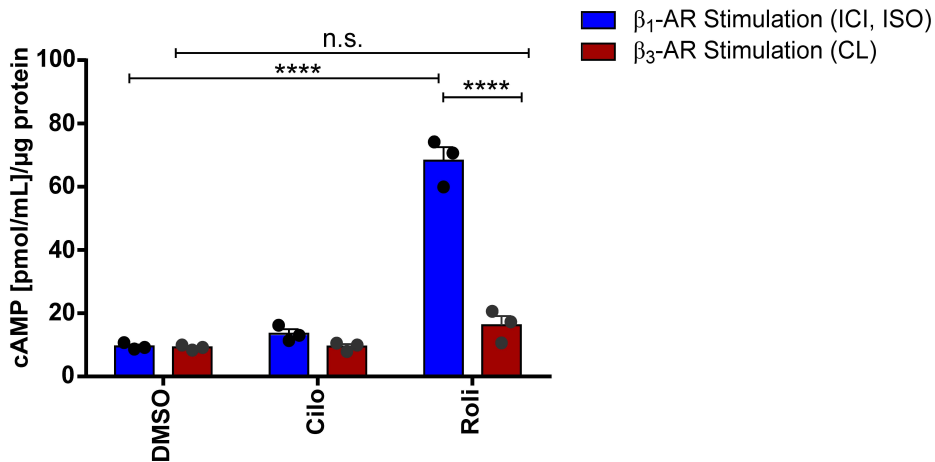

Suppl. Fig. 7

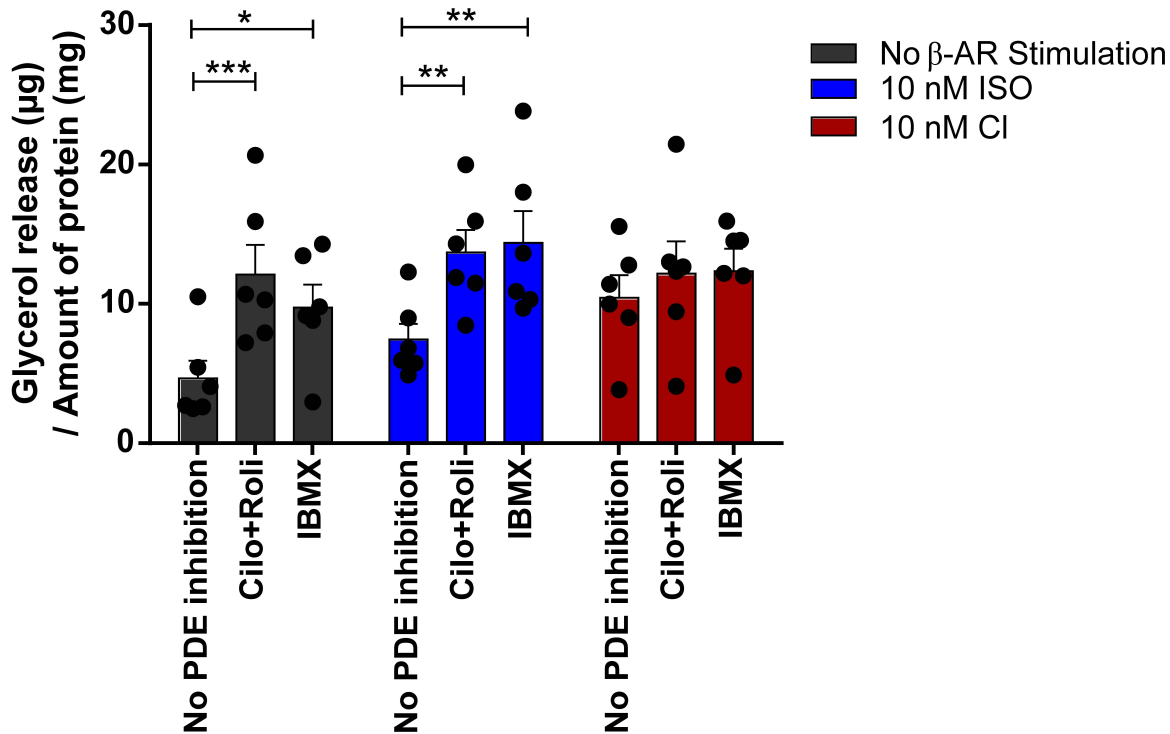

Supplement: mmc1.pdf [file mmc1.pdf]
